# Supplementary material for: Mutational characteristics of gastrointestinal stromal tumors: A single-center analysis of 302 patients
Source: PubMed Central journal article supplement — Oncol Lett. 2021 Jan 4;21(2):174. doi: 10.3892/ol.2021.12435 (PMC7798044; doi:10.3892/ol.2021.12435), 2021-01-04
Supplement: Supplementary_Data.pdf [file Supplementary_Data.pdf]

Table SI. PCR primers for *KIT* and *PDGFRA* exons.

| Gene          | Exon | Forward primer (5' to 3') | Reverse primer (5' to 3') |
|---------------|------|---------------------------|---------------------------|
| <i>KIT</i>    | 9    | CTTCCCTTTAGATGCTCTGCTTC   | CCTAAACATCCCCTTAAATTGGATT |
|               | 11   | GGTGATCTATTTTTCCCTTTCTCCC | TGACATGGAAAGCCCCTGTTTC    |
|               | 13   | GTATGGTACTGCATGCGCTTG     | TAAAAGGCAGCTTGGACACG      |
|               | 17   | ATGGTTTTCTTTTCTCCTCCAAC   | CCTTTGCAGGACTGTCAAGC      |
| <i>PDGFRA</i> | 12   | TTCAGTGAAGCTCTGGTGCAC     | ATGGAACTTACCAAGCACTAGTCC  |
|               | 14   | GTAGCTCAGCTGGACTGATA      | AATCCTCACTCCAGGTCAGT      |
|               | 18   | TTCCTTTTCCATGCAGTGTG      | AGCCTGACCAGTGAGGGAAG      |

*KIT*, *KIT* proto-oncogene, receptor tyrosine kinase; *PDGFRA*, platelet derived growth factor receptor  $\alpha$ .
